# Supplementary material
Source: ML conference proceedings conference paper supplement (https://proceedings.neurips.cc/paper_files/paper/2023/hash/8493c860bec41705f7743d5764301b94-Abstract.html)
Supplement: Supplementary file 1 [file 8493c860bec41705f7743d5764301b94-Supplemental-Conference.pdf]

387 **Appendix**

388 **A Illustrative Examples**

389 **Example 3** (Obtaining the Prolongation of  $SO(2)$ ). We can consider If  $X \times U = \mathbb{R} \times \mathbb{R}$  and the  
 390 infinitesimal generator of the 2-dimensional rotation group,  $SO(2)$ :

$$\begin{aligned} \mathbf{v}_{SO(2)} &= \xi(x, u)\partial_x + \phi(x, u)\partial_u \\ &= -u\partial_x + x\partial_u \end{aligned}$$

391 In this 2-dimensional case, the calculation of the prolonged generator is simple:

$$\begin{aligned} \phi^{(x)} &= D_x(\phi - \xi u_x) + \xi u_{xx} \\ &= D_x(x + uu_x) - uu_{xx} \\ &= (1 + u_x^2 + uu_{xx}) - uu_{xx} \\ &= 1 + u_x^2 \end{aligned}$$

392 Therefore:

$$\text{pr}^{(1)}\mathbf{v}_{SO(2)} = -u\partial_x + x\partial_u + (1 + u_x^2)\partial_{u_x}$$

393 We will work through another example of obtaining the prolongation of an infinitesimal generator of  
 394 the heat equation:

395 **Example 4** (Obtaining the Prolongation of an Infinitesimal Generator). As an example, we will  
 396 consider  $X \times U = \mathbb{R}^2 \times \mathbb{R}$  and the following infinitesimal generator, which is a symmetry of the heat  
 397 equation:

$$\begin{aligned} \mathbf{v} &= \xi_1(x, t, u)\partial_x + \xi_2(x, t, u)\partial_t + \phi(x, t, u)\partial_u \\ &= 2\nu t\partial_x - xu\partial_u \end{aligned}$$

398 where  $x, t$  denote the independent variables,  $u$  is the dependent variable and  $\nu$  is a positive constant.  
 399 By the prolongation formula, Eq. (4), the first prolongation in  $t$  is given by:

$$\begin{aligned} \phi^t &= D_t(\phi - \xi_1 u_x - \xi_2 u_t) + \xi_1 u_{xt} + \xi_2 u_{tt} \\ &= D_t(-xu - 2\nu t u_x) + 2\nu t u_{xt} \\ &= -x u_t - 2\nu u_x \end{aligned}$$

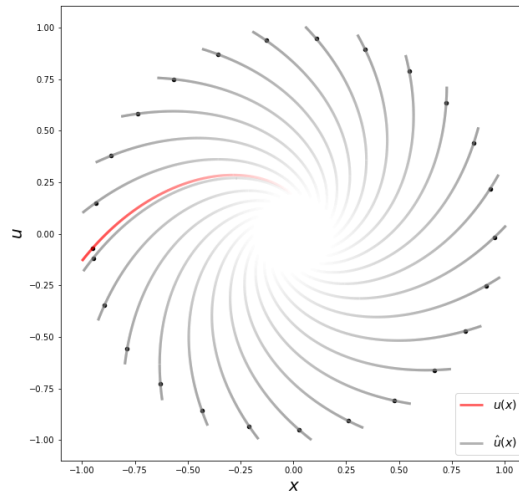

Figure 4: Various solutions of the PDE  $\Delta(x, u, u_x) = (u - x)u_x + u + x = 0$  obtained via symmetry transformation (rotation) of a know solution (in red).

400 As a final illustrative example of the symmetry criterion, we will follow Olver's example below:

401 **Example 5.** *As an illustrative example of the infinitesimal criterion, we can consider a simple DE:*

$$\Delta(x, u, u_x) = (u - x)u_x + u + x = 0$$

402 *We can easily see that  $SO(2)$  is a symmetry group of this differential equation, using the prolongation*  
 403 *of the generator we calculated in Example 3:*

$$\begin{aligned} \text{pr}^{(1)}\mathbf{v}[\Delta] &= -u\Delta_x + x\Delta_u + (1 + u_x^2)\Delta_{u_x} \\ &= -u(1 - u_x) + x(1 + u_x) + (1 + u_x^2)(u - x) \\ &= u_x\Delta \end{aligned}$$

404 *Since  $\Delta_{u_x} = 0$  when  $\Delta = 0$ , we can conclude that  $SO(2)$  is indeed a symmetry group of the*  
 405 *equation. In fact, we can see that it transforms solutions of this differential equation to other solutions*  
 406 *in Fig. 4.*

## 407 B Implementation Details

408 We model the two networks,  $g_{\theta_1}$  and  $e_{\theta_2}$  in Eq. (9) with MLPs consisting of 7 hidden layers of width  
 409 100. This choice was based on the previous research using PINN and DeepONets for solving Burgers’  
 410 equation [Wang et al., 2021b]. We used elu activation as differentiable activations are required for  
 411 the PDE loss. The output of the embedding vectors from both networks is 100 dimensional.

412 For both the Heat equation and Burgers’ equation experiments, we perform hyper-parameter tuning  
 413 on the coefficients of the loss terms from the set  $[0.1, \dots, 1, \dots, 10, \dots, 100, \dots, 200]$ . This is done  
 414 separately for the baseline model and the model trained with symmetry loss,  $\mathcal{L}_{\text{sym}}$ , as we varied the  
 415 number of samples,  $N_r$ .

416 We also note that for Burgers’ equation, we found that cosine similarity for  $\mathcal{L}_{\text{sym}}$  works better than  
 417 the dot product. The results reported in Section 4 use cosine-similarity.

418 We will make the data and the code available on GitHub.

## 419 C Additional Results

420 In the figure below, we can see the behaviour of the two models, trained with and without symmetry  
 421 loss for Burgers’ equation, as we increase the number of training samples. It can be seen that, as  
 422 expected, in the model trained with  $\mathcal{L}_{\text{sym}}$  performs significantly better with low samples inside the  
 423 domain. The corresponding mean-squared errors are reported in Table 2.

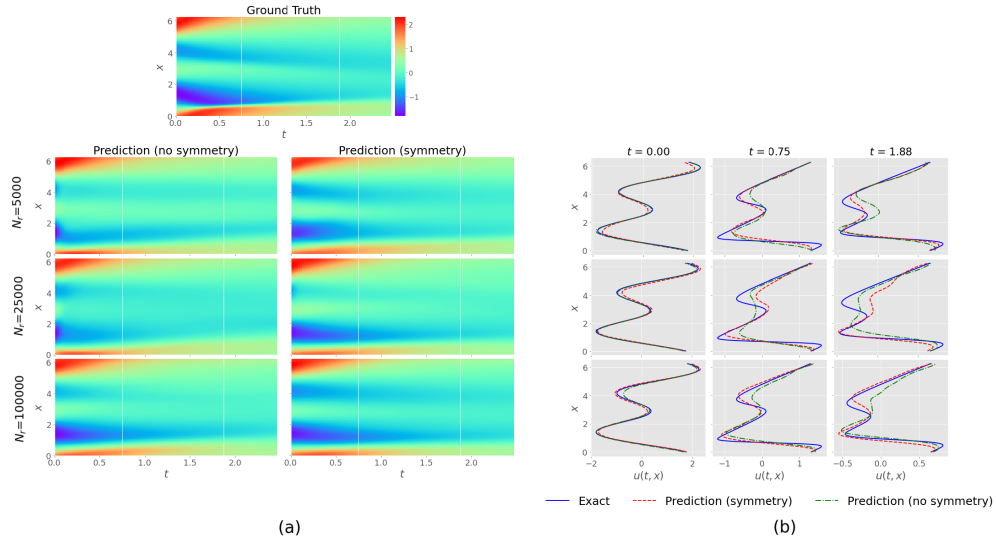

Figure 5: The effect of training the PDE solver for the Burgers' equation with and without the symmetry loss for one of the PDEs in the test dataset. (a) shows the ground truth solution and the predictions of the two models as the number of samples inside the domain increases from 5000 to 25000 and 100000. (b) shows the corresponding predictions and the ground truth solution at different time slices.
